# Supplementary material for: Genome-wide localization analysis of a complete set of Tafs reveals a specific effect of the taf1 mutation on Taf2 occupancy and provides indirect evidence for different TFIID conformations at different promoters
Source: PubMed Central journal article supplement — Nucleic Acids Res. 2009 Dec 21;38(6):1805–20. doi: 10.1093/nar/gkp1172 (PMC2847235; doi:10.1093/nar/gkp1172), 2009-12-21
Supplement: gkp1172_1.pdf [file gkp1172_1.pdf]

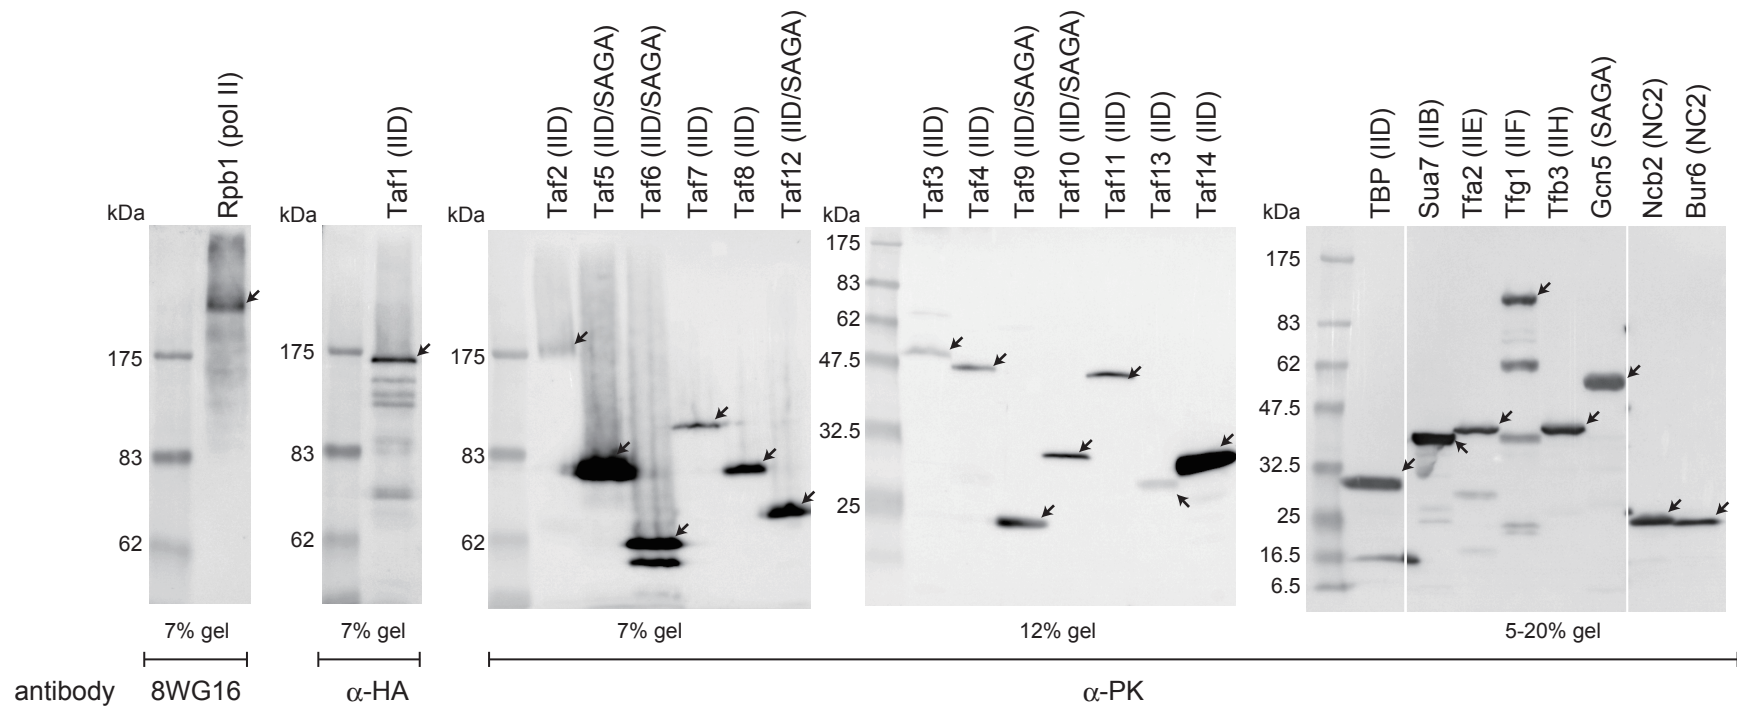

25°C

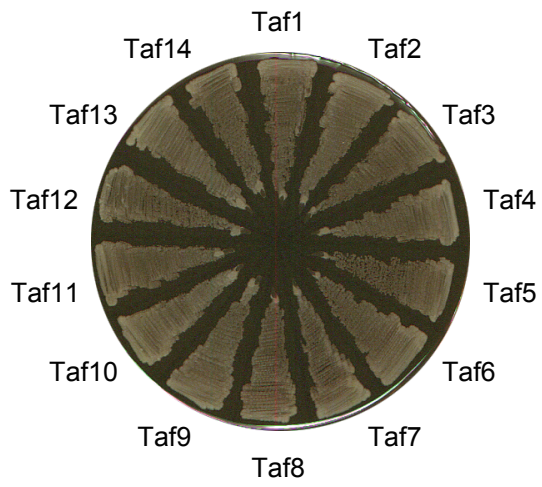

37°C

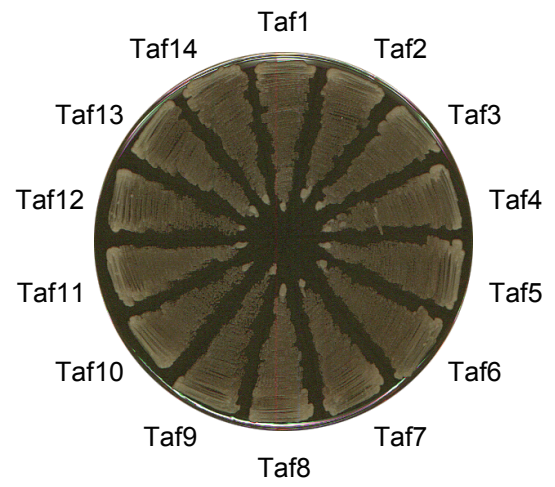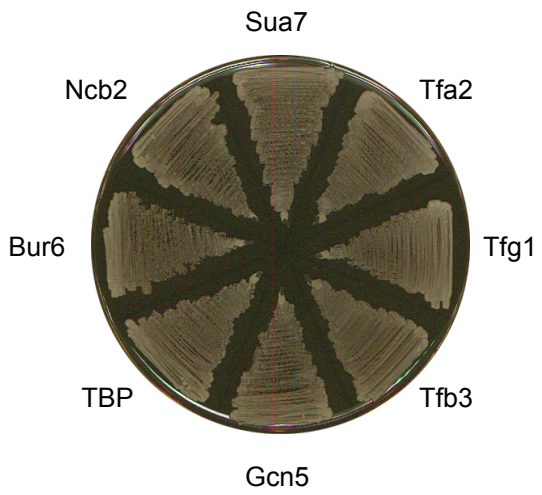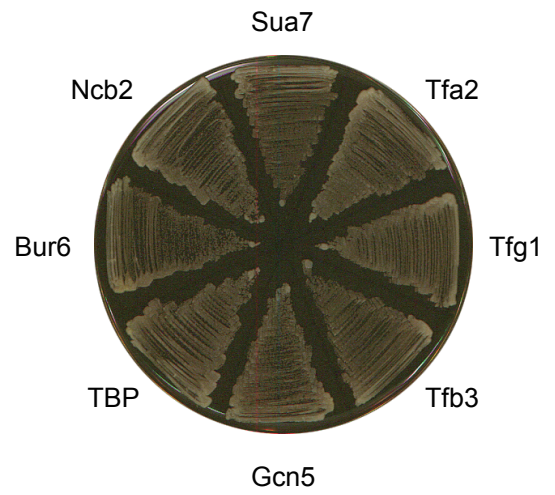

Supplemental Figure 2. Ohtsuki et al.

**A**

1st IP → 2nd IP

|   |         | Taf1 (HA) | Gcn5 (PK) |
|---|---------|-----------|-----------|
| 1 | YTK2741 | +         | -         |
| 2 | YTK6773 | -         | +         |
| 3 | YTK6831 | +         | +         |

**B**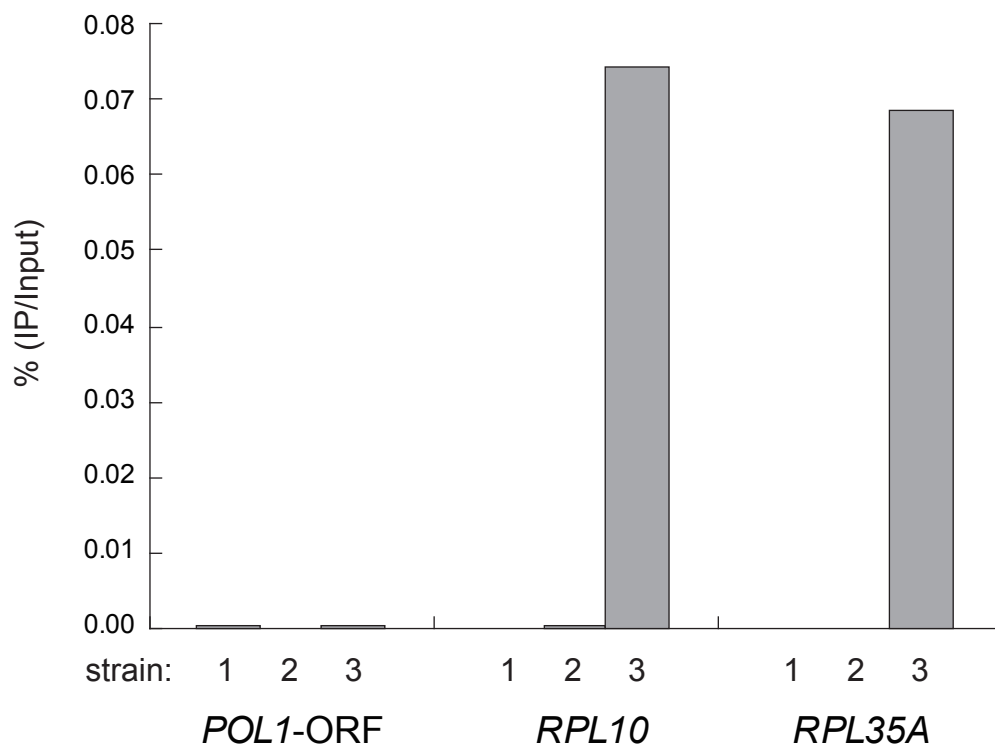

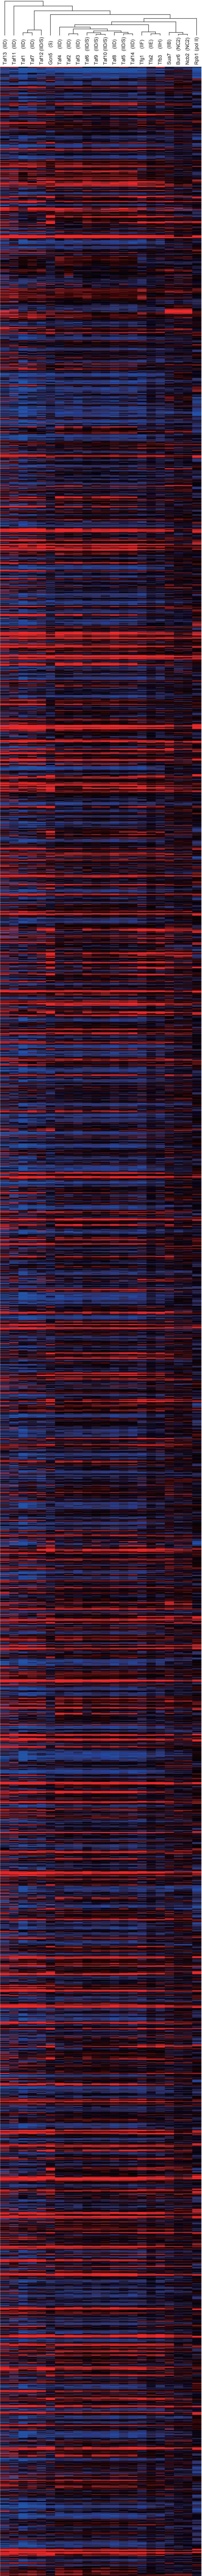

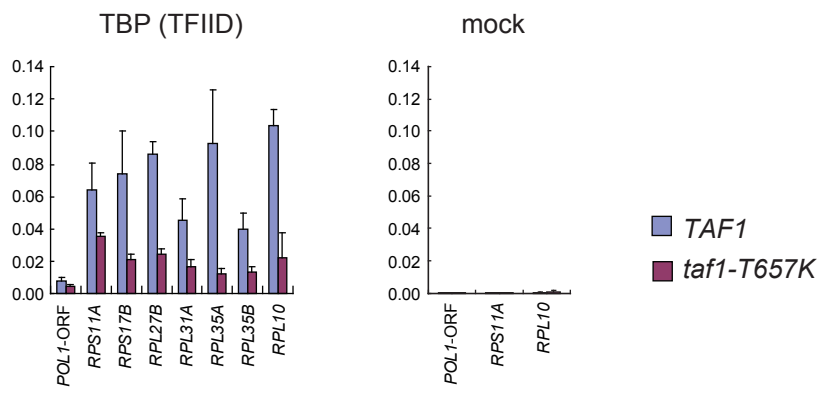

Supplemental Figure 11. Ohtsuki et al

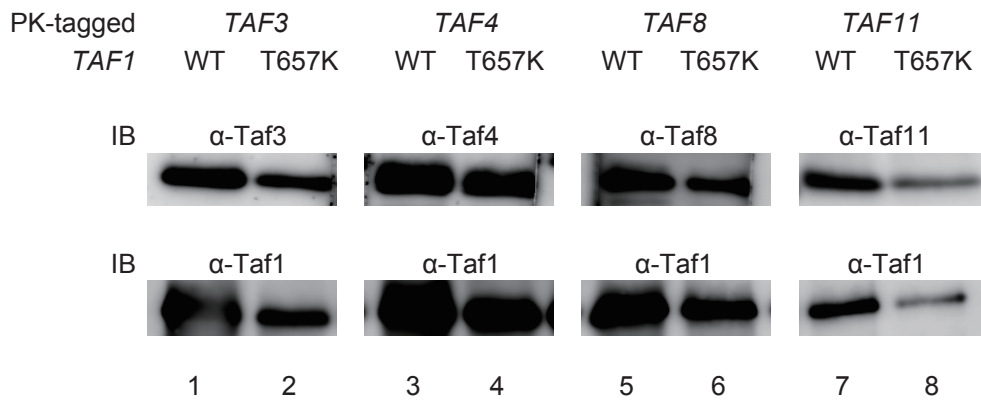

Supplemental Figure 12. Ohtsuki et al
