# Supplementary figures and images for: Genome-wide localization analysis of a complete set of Tafs reveals a specific effect of the taf1 mutation on Taf2 occupancy and provides indirect evidence for different TFIID conformations at different promoters
Source: PubMed Central journal article supplement — Nucleic Acids Res. 2009 Dec 21;38(6):1805–20. doi: 10.1093/nar/gkp1172 (PMC2847235; doi:10.1093/nar/gkp1172), 2009-12-21

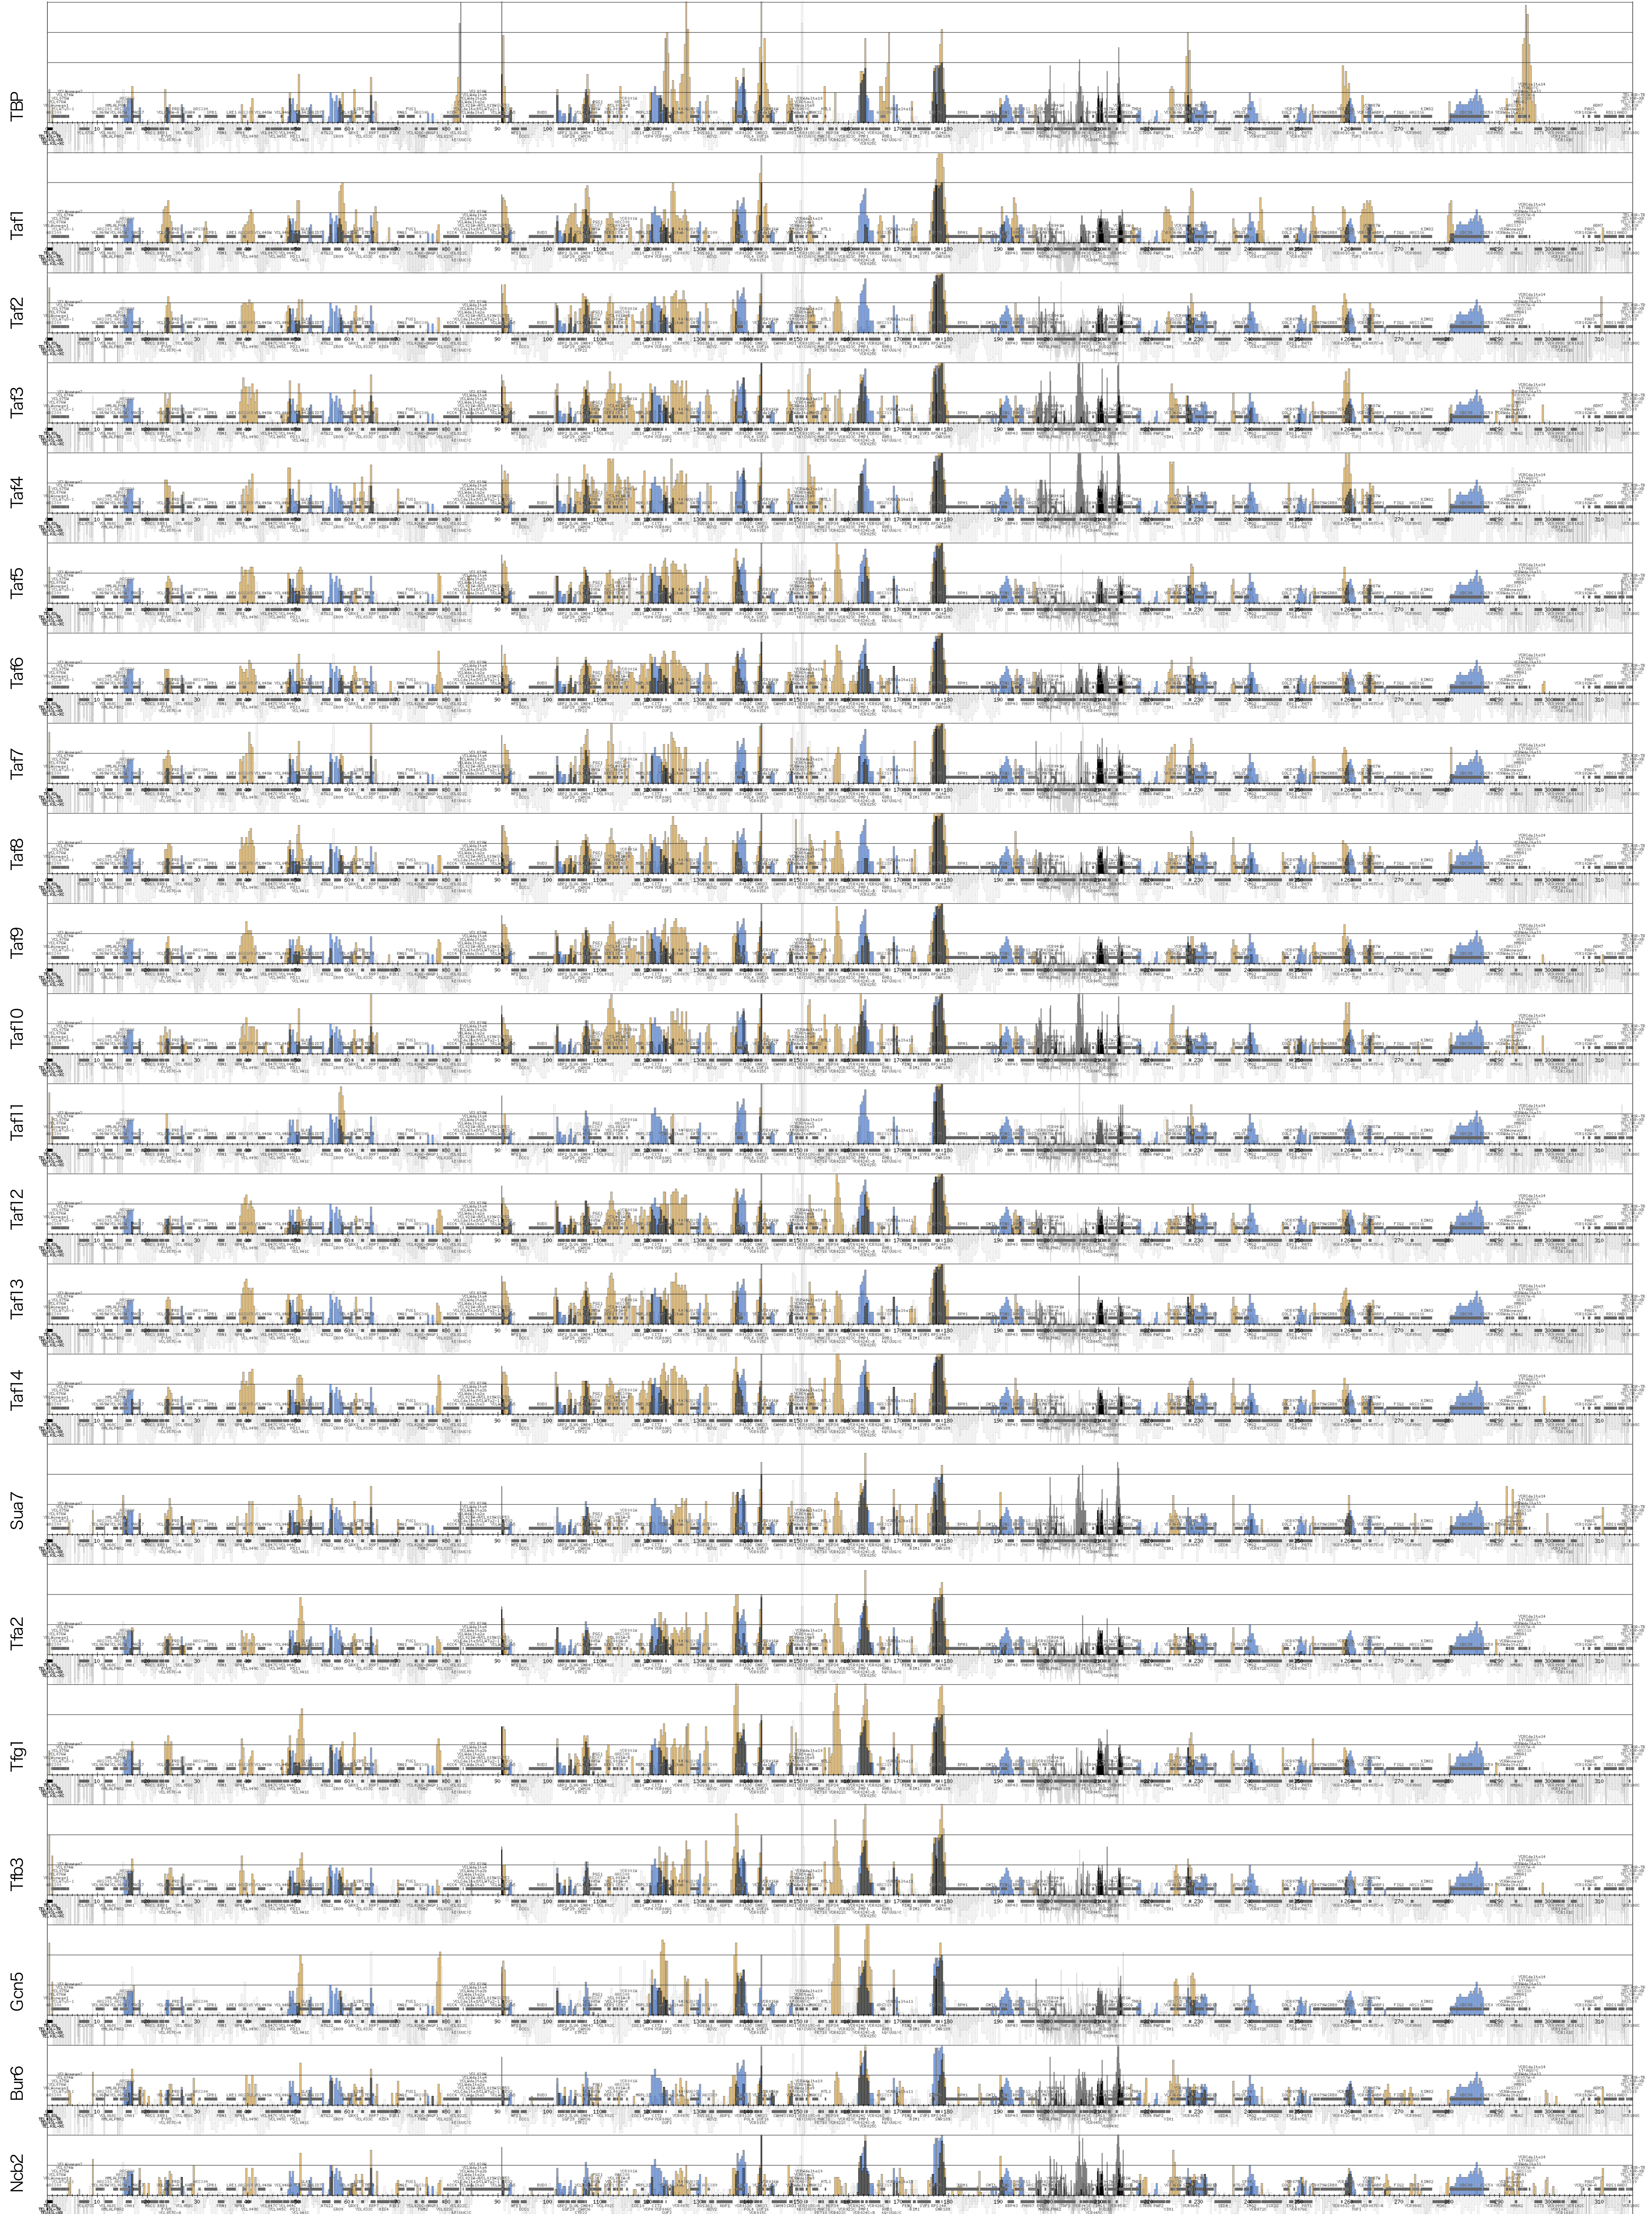

Supplement: gkp1172_3.pdf [file gkp1172_3.pdf]

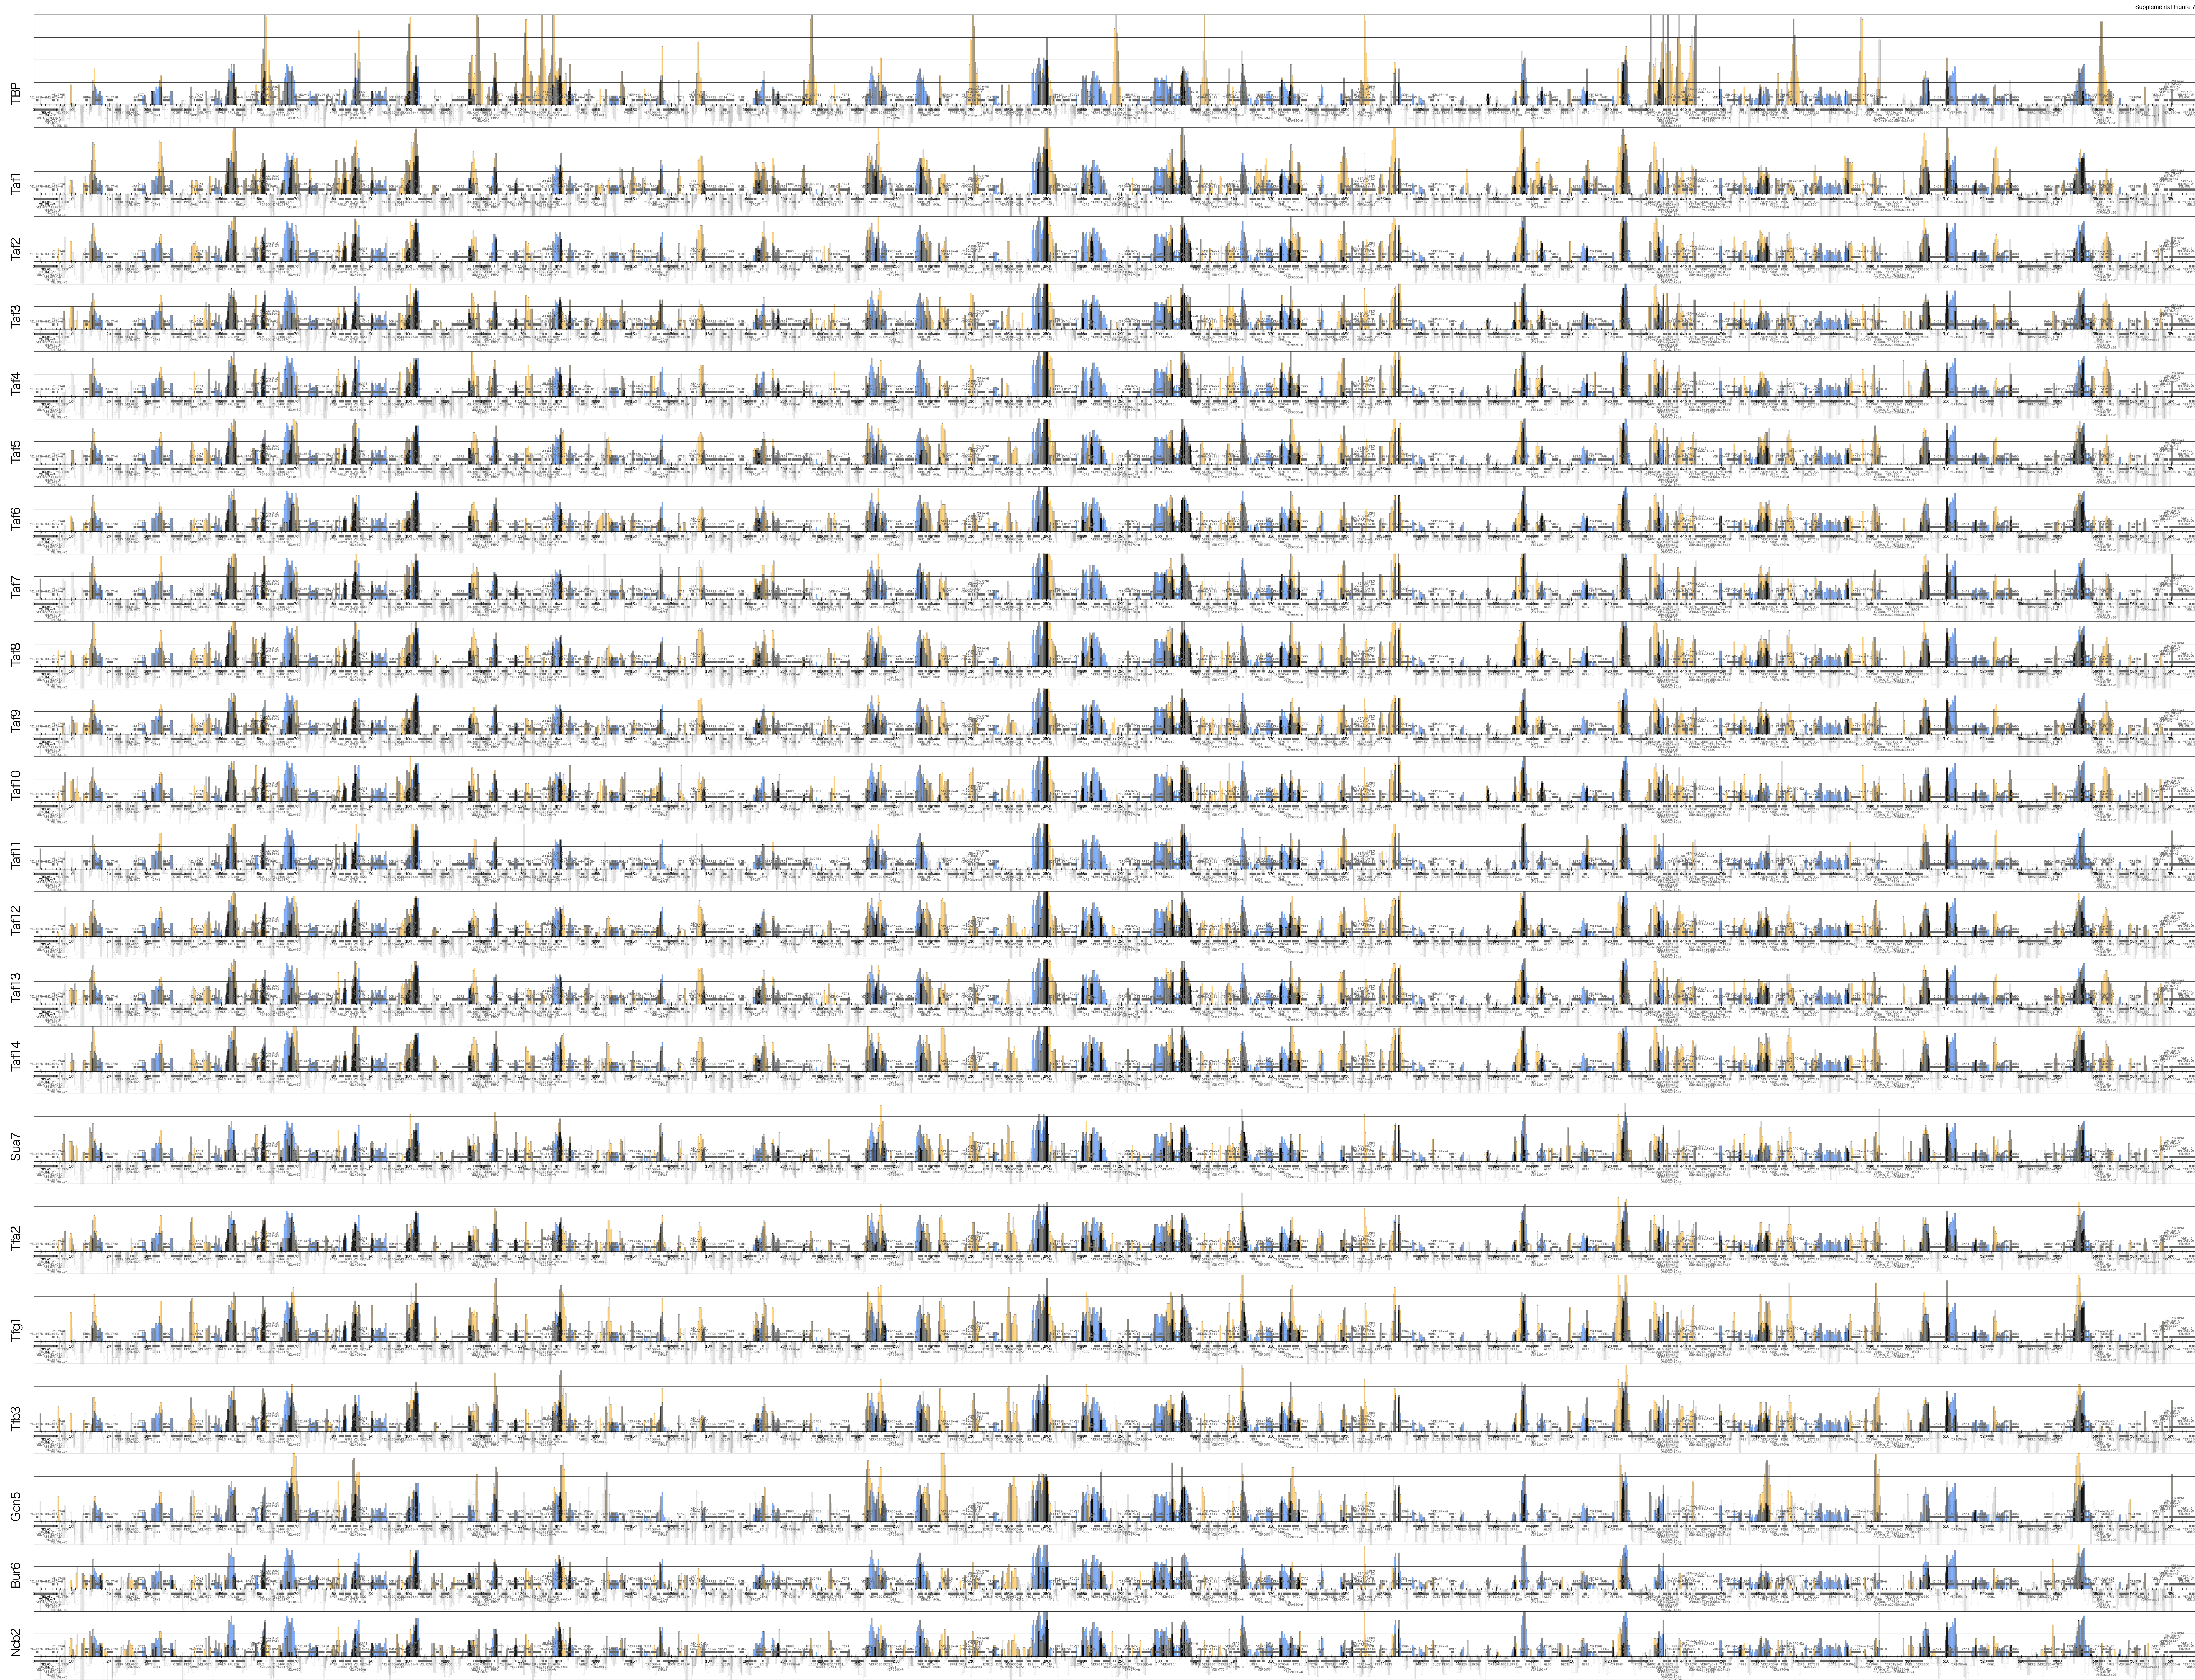

Supplement: gkp1172_5.pdf [file gkp1172_5.pdf]

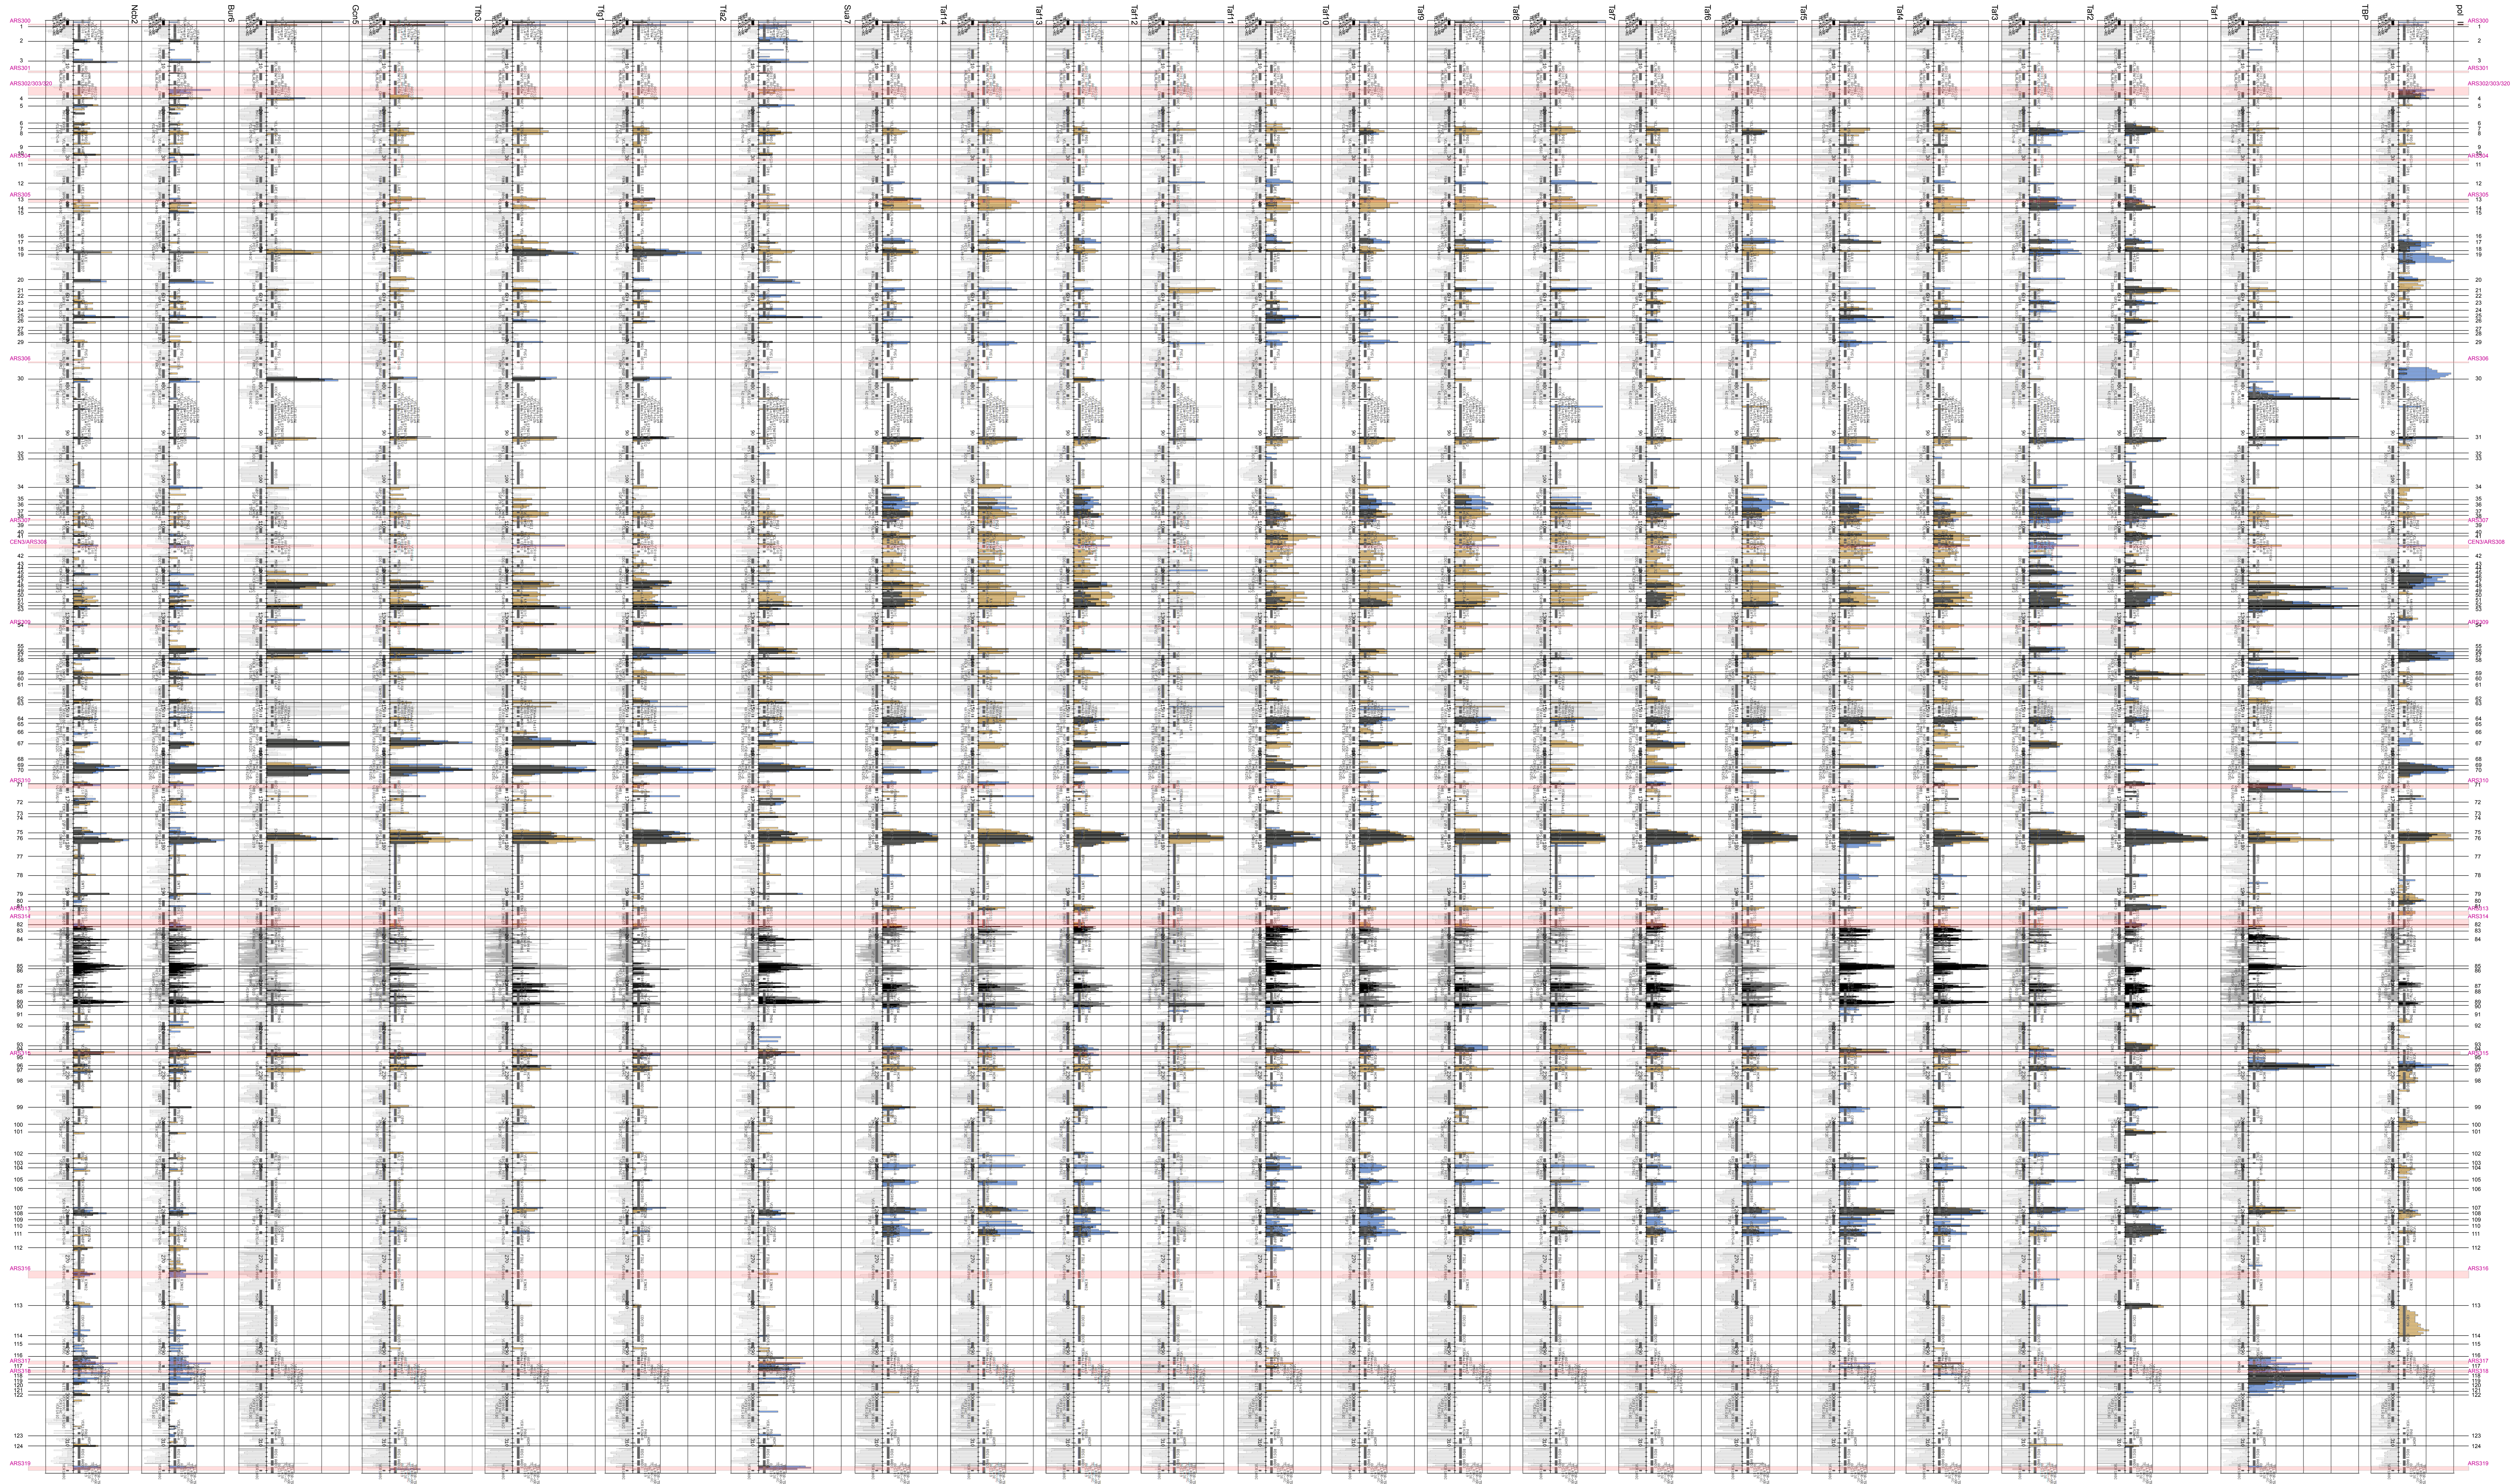

Supplement: gkp1172_6.pdf [file gkp1172_6.pdf]

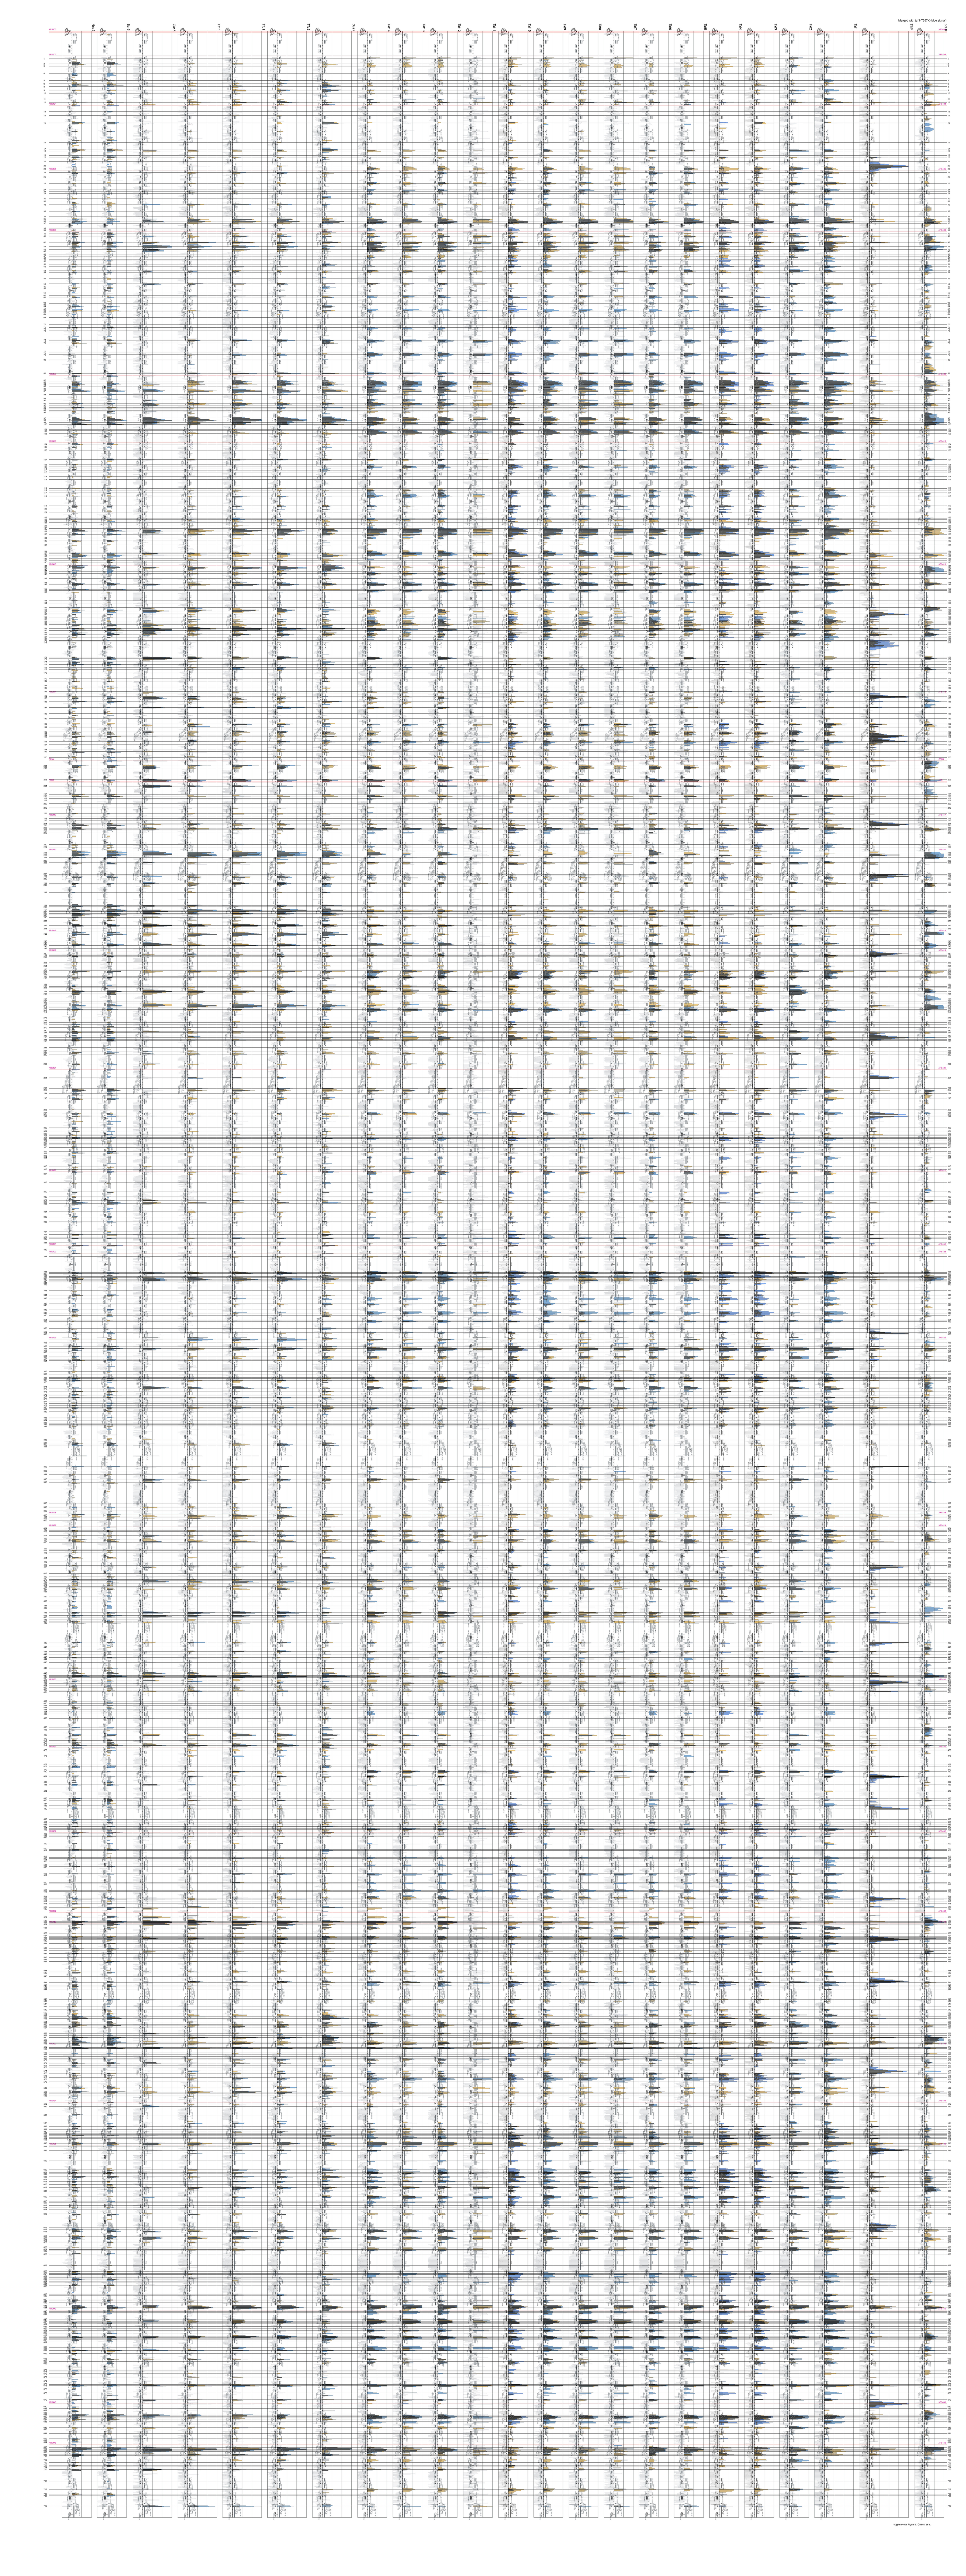

Supplement: gkp1172_7.pdf [file gkp1172_7.pdf]
